# Supplementary material for: Population Genomics Insights into the First Wave of COVID-19
Source: PubMed Central journal article supplement (PMC7914631; doi:10.3390/life11020129), 2021-02-07
Supplement: life-11-00129-s001.pdf [file life-11-00129-s001.pdf]

# Supporting material

## Supplementary text S1

**The recombination detection process:** As described in the main text (2.2 section in Materials and Methods), the blue region that matches species A CoV, should be in the beginning of the 300-mer, and the red part (matches species B CoV) should be at the end of the 300-mer. The choice of the 300 bps as the length of the  $k$ -mer was justified by experimentation. Short  $k$ -mers (e.g., 100-mers) were generating blast matches at various genome locations, whereas very large  $k$ -mers were often not able to match their entire length, either up to their beginning or end. However, it should be noted that the length of the recombinant sequence interval (300-mer) does not affect the results of the analysis considerably. If for example a small piece of Species B CoV has been recombined, then *seq1* and *seq4* (Figure S1) might not be able to match Species B CoV up to their end (since their “right” part might be too long), however other unique sequences (e.g. *seq2* and/or *seq3* that are characterized by a shorter “right” part) will give a match.

**Table S1:** Linkage Disequilibrium linear model results. With bold face fonts we denote the populations characterized by p-values < 0.01 for the  $a$  parameter (the slope of the linear model).

| <b>Population</b> | <b><math>a</math> (p-value)</b> | <b><math>b</math> (p-value)</b> |
|-------------------|---------------------------------|---------------------------------|
| All               | -1.152e-07 (<2e-16)             | 3.944e-03 (<2e-16)              |
| Europe            | -1.905512e-07 (<2e-16)          | 6.344816e-03 (<2e-16)           |
| North America     | -3.172727e-08 (0.113)           | 5.861180e-03 (<2e-16)           |
| South America     | -2.704880e-07 (0.818)           | 1.967903e-01 (<2e-16)           |
| Africa            | 3.3661e-06 (3.380589e-02)       | 1.4271e-01 (1.4423e-11)         |
| Oceania           | 9.764460e-08 (0.648)            | 2.821038e-02 (<2e-16)           |
| Asia              | -1.494132e-06 (<2e-16)          | 3.608169e-02 (<2e-16)           |

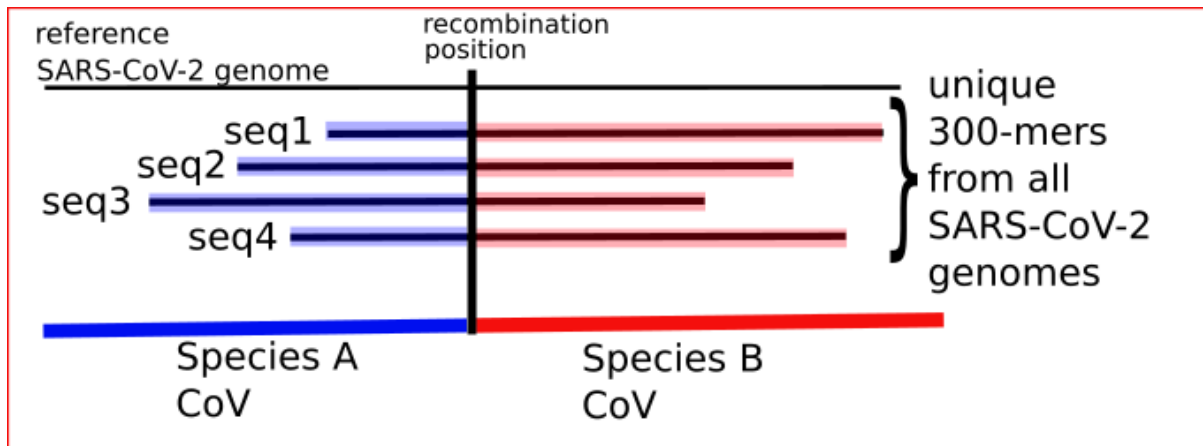

**Figure S1.** Identifying recombination events in SARS-CoV-2 genome data. All unique 300-mers from human SARS-CoV-2 sequences (seq1, seq2, seq3, seq4) were aligned, as a blast query, against all available CoV sequences (blast database) from other species (bottom part of the figure). Recombination is detected if around a location (here denoted as ‘recombination position’) on the reference genome (black horizontal line on the top), there are 300-mers for which the left part (blue color) matches species A CoV, whereas the right part (red color) matches species B CoV.

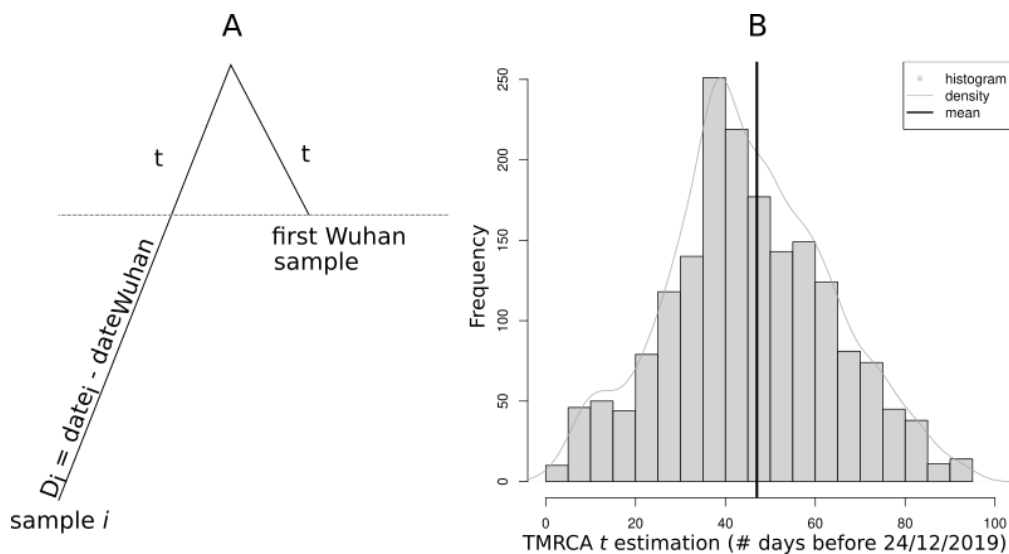

**Figure S2:** (A) The parameter  $t$  denotes the time of the most recent common ancestor as estimated in units of days prior to 24/12/2019, the collection date of the first Wuhan sample that was repositied in GISAID. (B) The mean parameter value estimation was  $t_{est} = 47.0$ , and the variance was 504.45. The histogram depicts the density and the mean value for the parameter  $t$ , the time of the most recent common ancestor measured in days before the first Wuhan sample (24/12/2019)

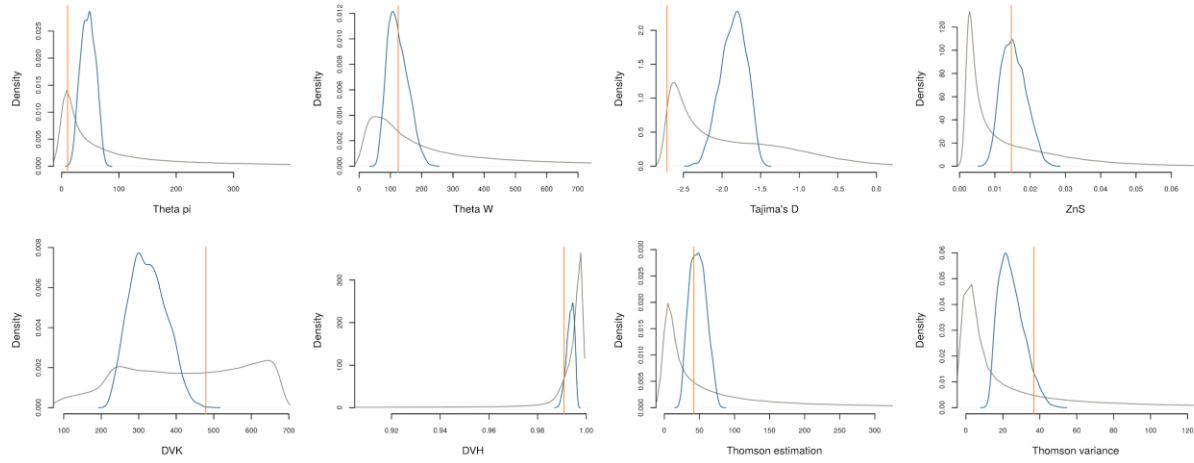

**Figure S3:** ABC parameter inference for the European population based on a set of 8 summary statistics. Orange line: Observed value of each summary statistic; Grey curve: density curve of the summary statistics calculated from the whole simulation space; Blue curve: density estimation of the ABC accepted summary statistics that were determined with a tolerance  $\tau=0.005$ .

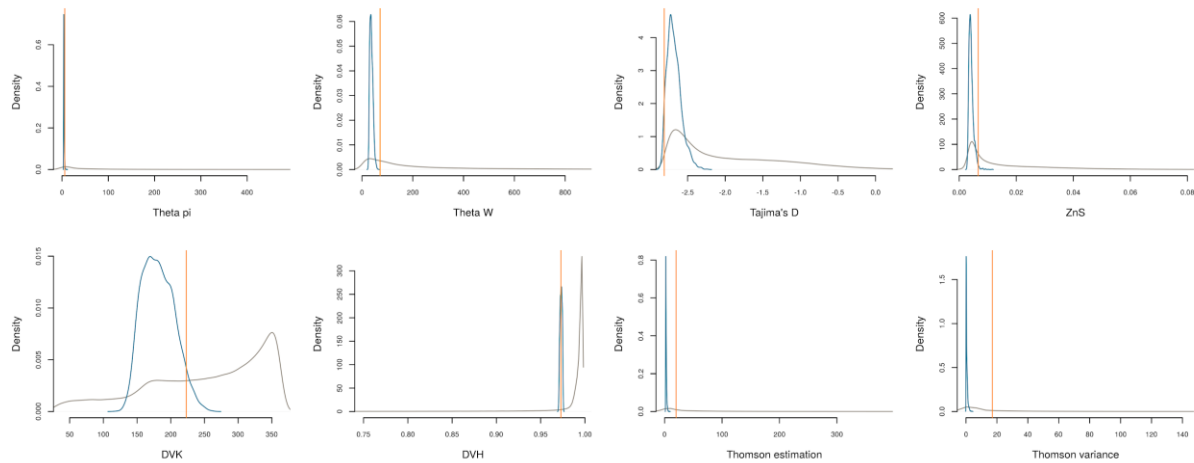

**Figure S4:** ABC parameter inference for the Asian population based on a set of 8 summary statistics. Orange line: Observed value of each summary statistic; Grey curve: density curve of the summary statistics calculated from the whole simulation space; Blue curve: density estimation of the ABC accepted summary statistics that were determined with a tolerance  $\tau=0.005$ .

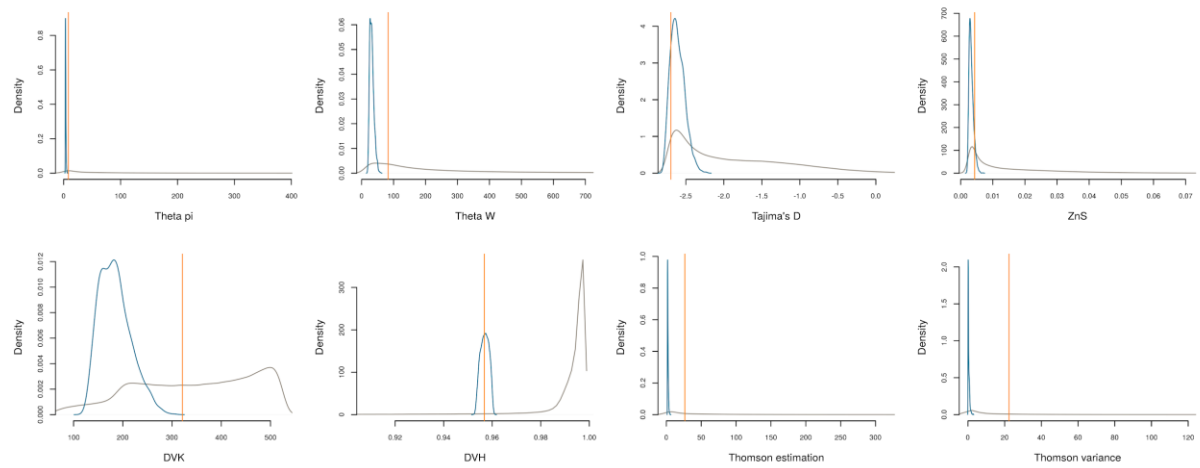

**Figure S5:** ABC parameter inference for the Northern American population based on a set of 8 summary statistics. Orange line: Observed value of each summary statistic; Grey curve: density curve of the summary statistics calculated from the whole simulation space; Blue curve: density estimation of the ABC accepted summary statistics that were determined with a tolerance  $\tau=0.005$ .

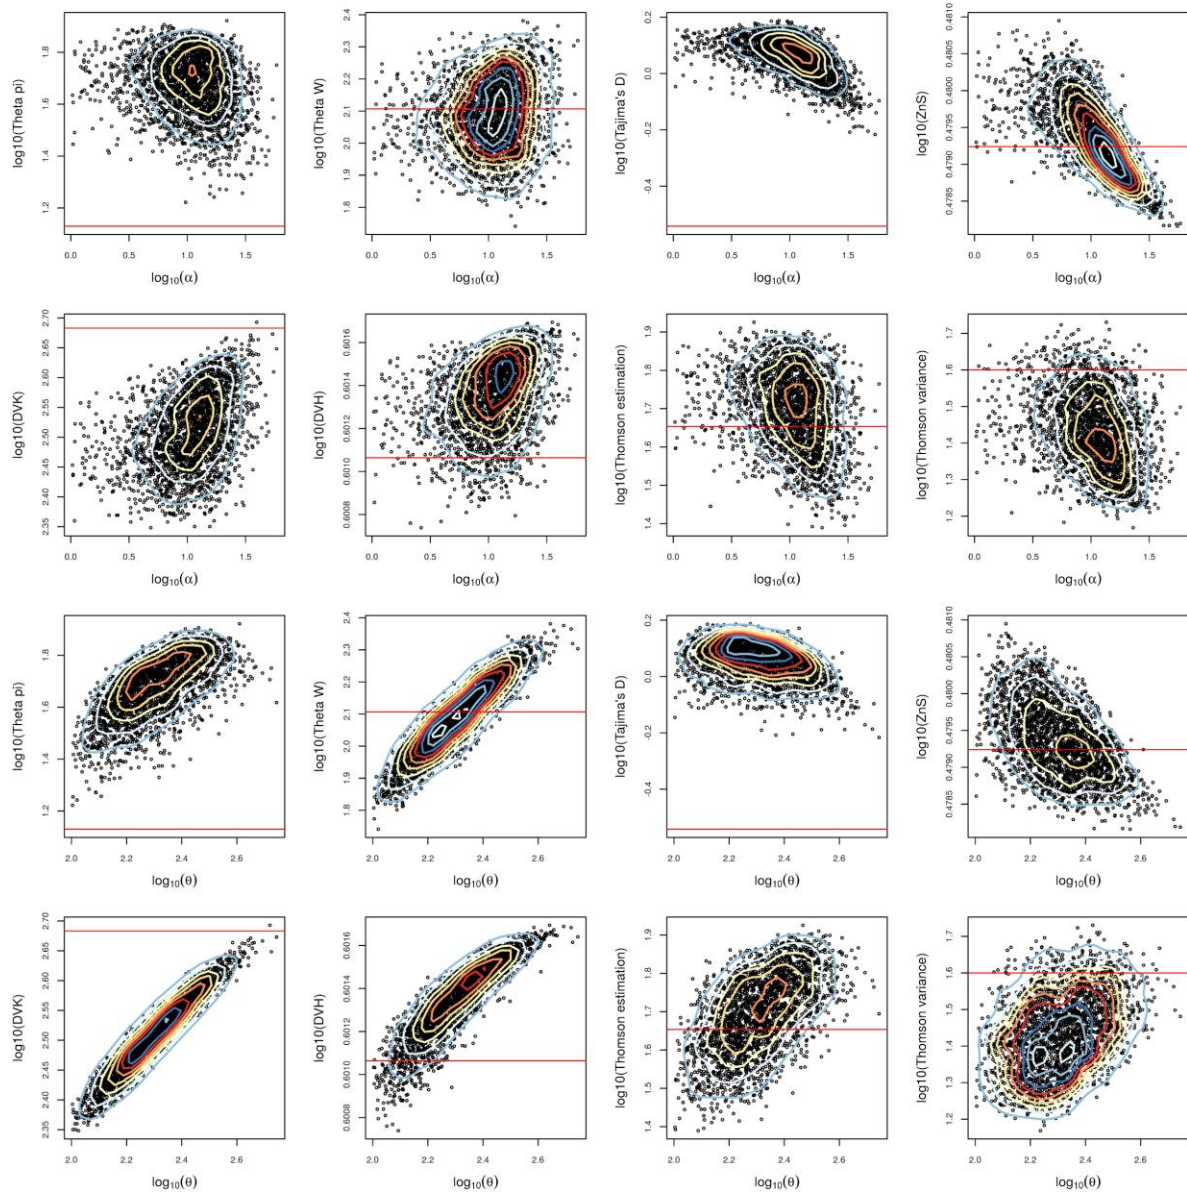

**Figure S6:** The space of the ABC accepted simulations of the European population. The contour lines on the scatterplot indicate the density estimation.

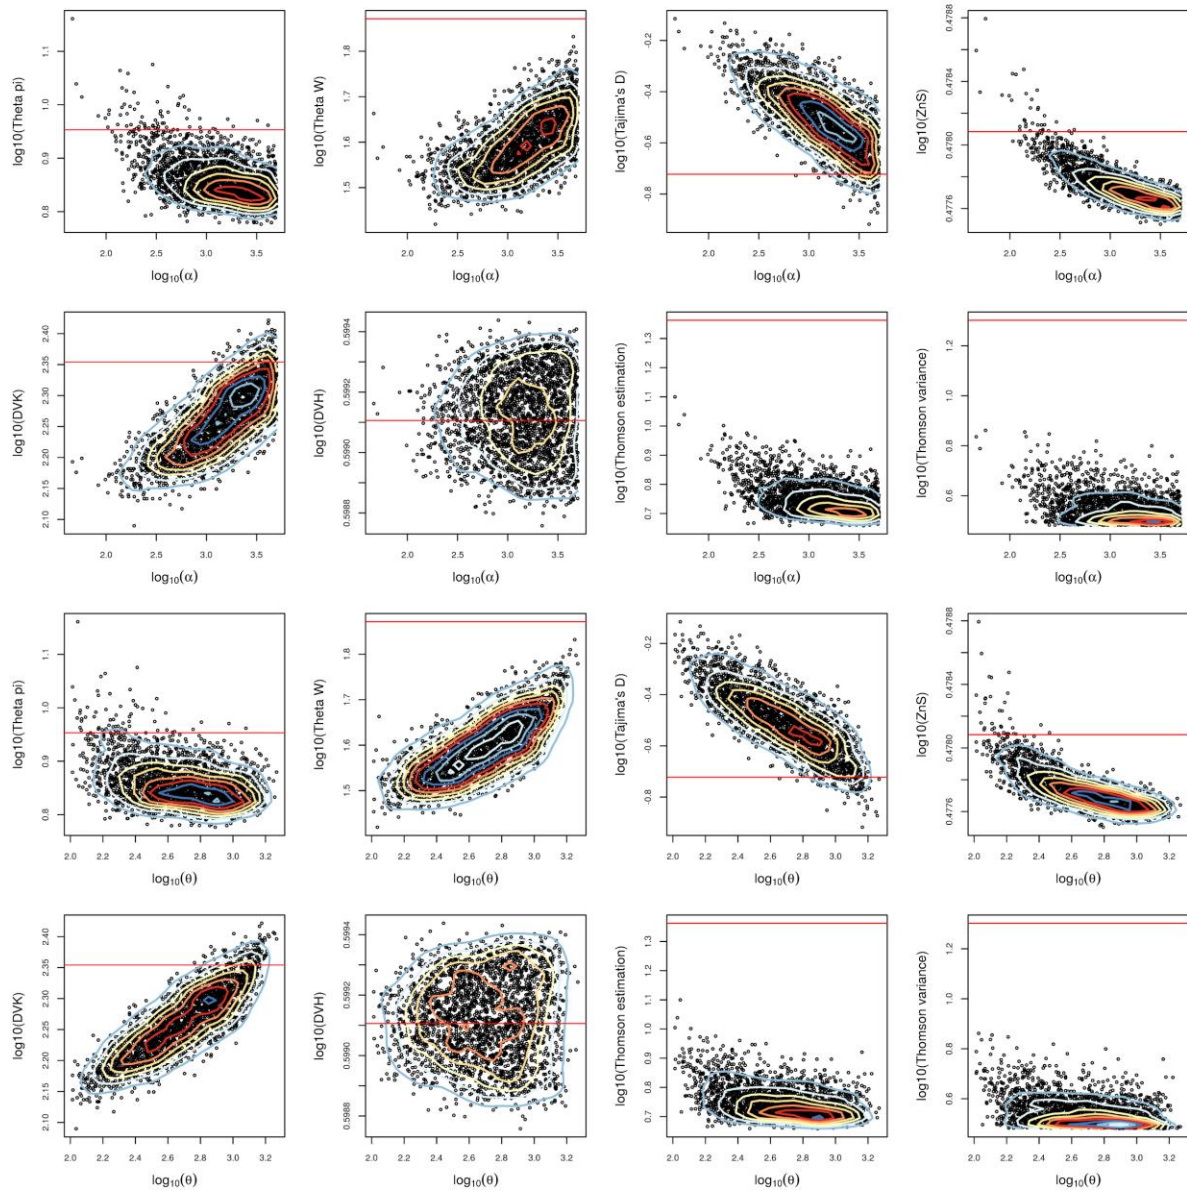

**Figure S7:** The space of the ABC accepted simulations of the Asian population. The contour lines on the scatterplot indicate the density estimation.

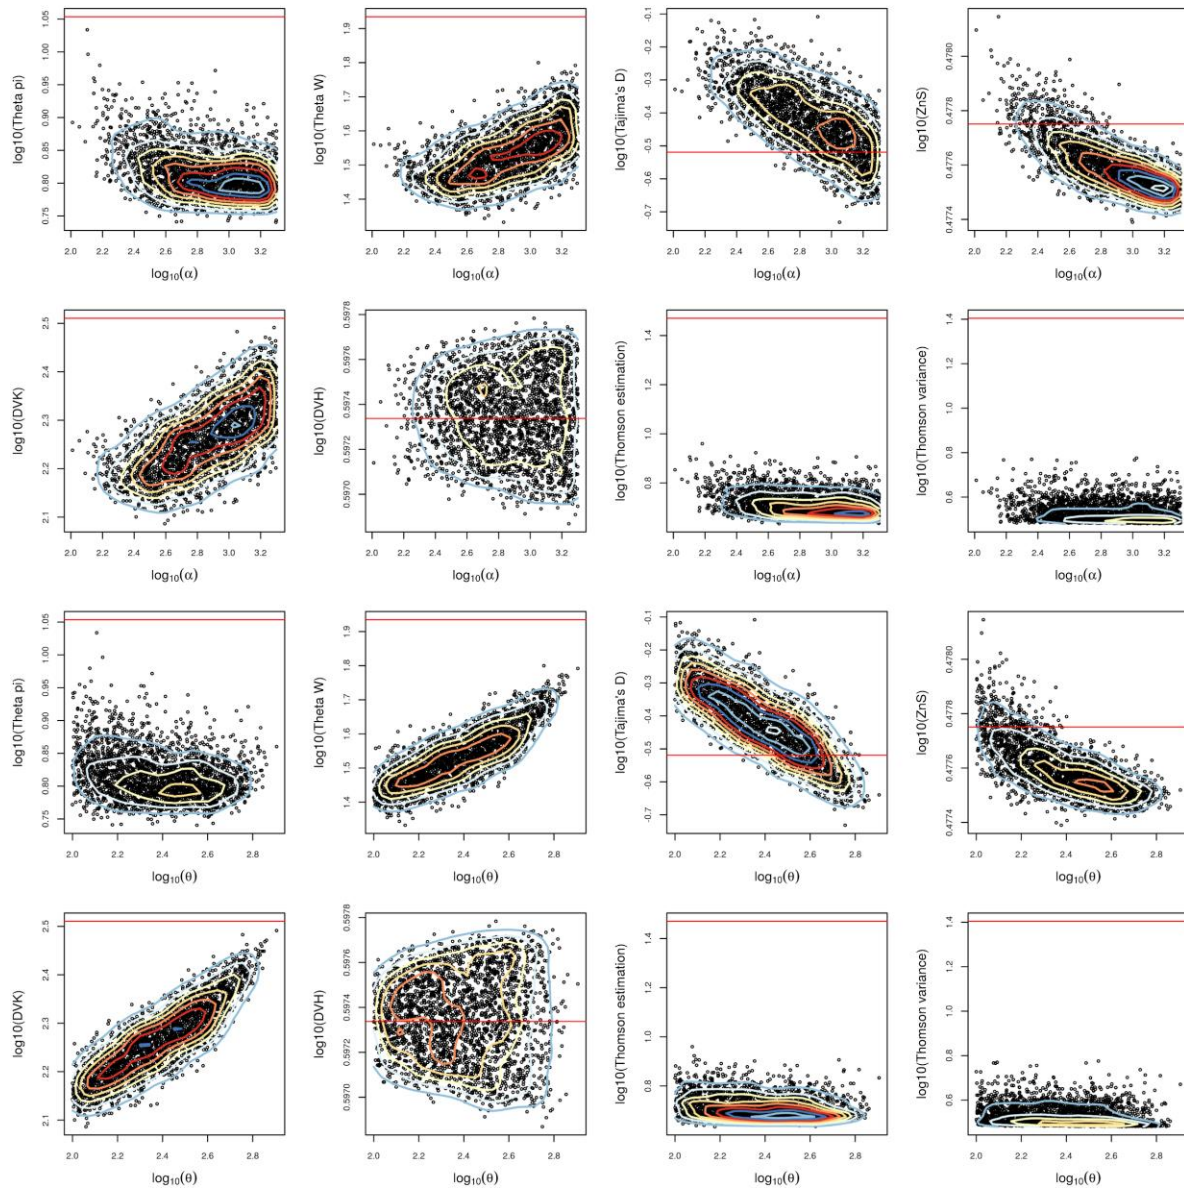

**Figure S8:** The space of the ABC accepted simulations of the Northern American population. The contour lines on the scatterplot indicate the density estimation.

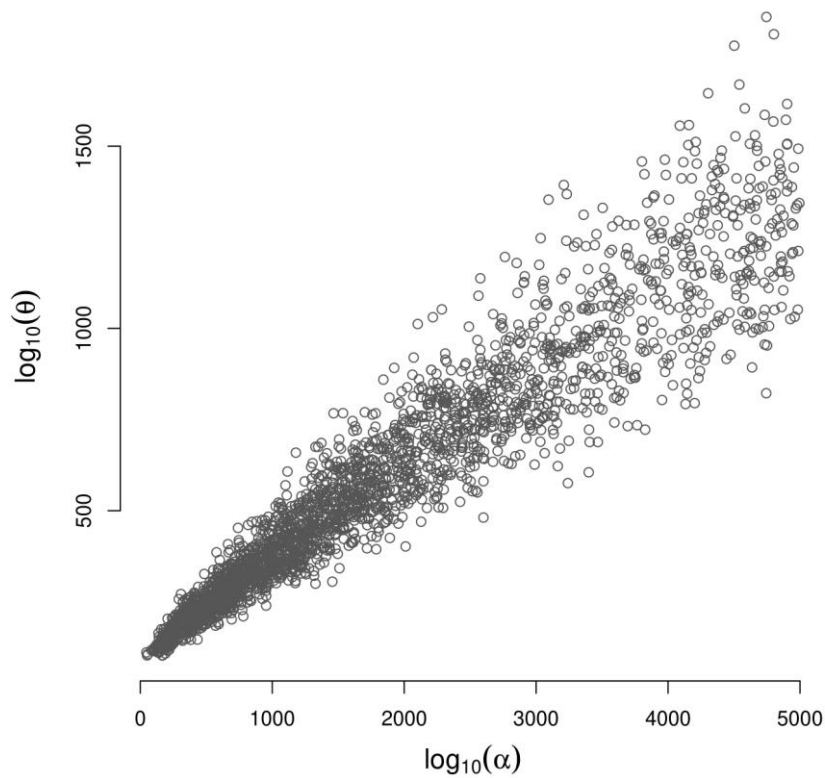

**Figure S9:** Correlation of Asia’s population  $\alpha$  and  $\theta$  parameters of the ABC accepted simulations (unadjusted values). The Pearson correlation coefficient is 0.95.

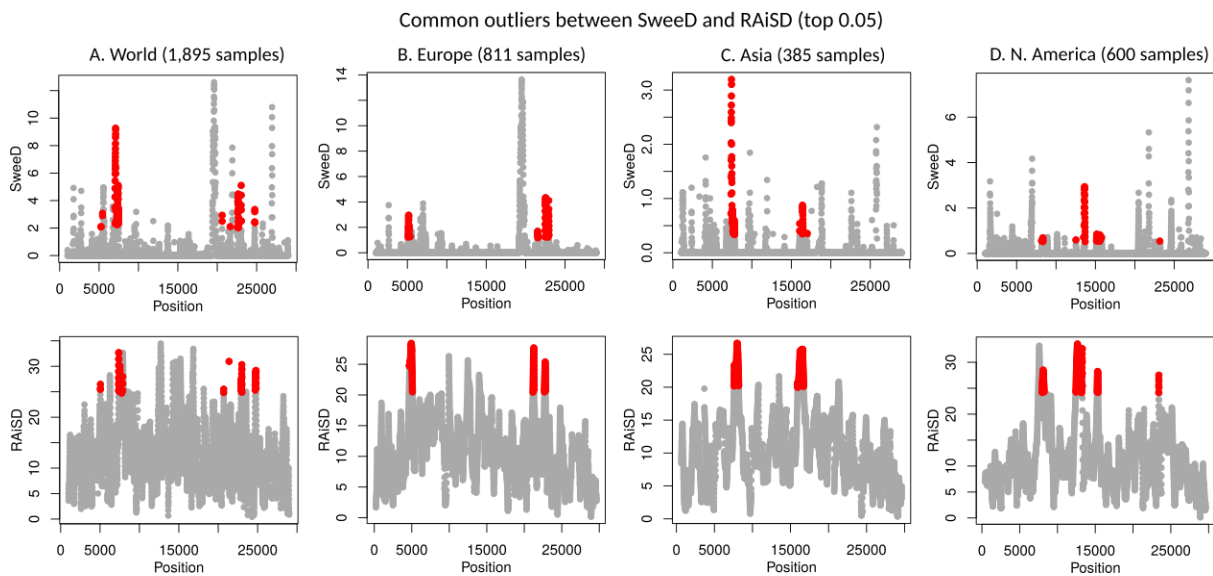

**Figure S10:** Common outliers between SweeD and RAiSD (top 0.05): A. World sample (1,895 genomes), B. Europe (811 genomes), C. Asia (385 genomes), and D. North America (600 genomes).
